# Supplementary material for: Zinc as a Promising Anodic Material for All-Solid-State Lithium-Ion Batteries
Source: MDPI journal article supplement (doi:10.3390/batteries8090113), 2022-09-05
Supplement: s1 [file s1]

Archive with 1 entries (1 files):
- batteries-1866986-supplementary.pdf
