# Supplementary material for: Zinc as a Promising Anodic Material for All-Solid-State Lithium-Ion Batteries
Source: MDPI journal article supplement (doi:10.3390/batteries8090113), 2022-09-05
Supplement: s1 [file s1 › batteries-1866986-supplementary.pdf]

# Zinc as a Promising Anodic Material for All-Solid-State Lithium-Ion Batteries

## Supplementary Information

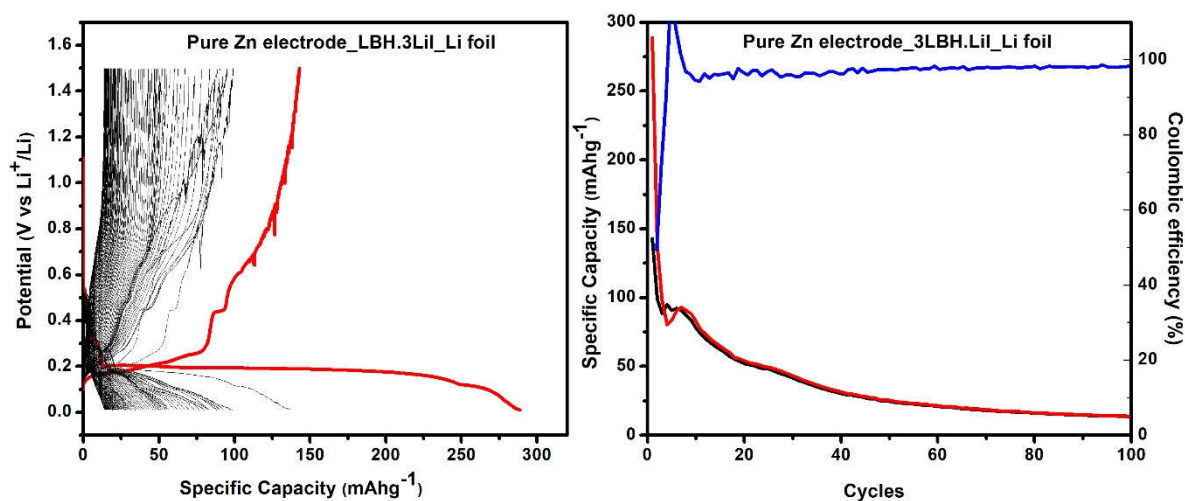

Figure S1. Galvanostatic charge/discharge curve for Zn/LiBH<sub>4</sub>.Li/Li foil coin cell (left); cyclic stability and coulombic efficiency of the same coin cell.
